# Supplementary material for: Second Primary Malignancy Risk in Multiple Myeloma from 1975 to 2018
Source: MDPI journal article supplement (doi:10.3390/cancers14194919), 2022-10-07
Supplement: s1 [file s1]

**Table S1.** Standardized incidence ratios (SIR) of solid second primary malignancies (SPM).

|                                |                               |                                |                               |                               |                               |                                |
|--------------------------------|-------------------------------|--------------------------------|-------------------------------|-------------------------------|-------------------------------|--------------------------------|
| <b>All</b>                     | 0.93 (0.90-0.97) <sup>#</sup> | 0.97 (0.83-1.14)               | 0.93 (0.84-1.02)              | 0.90 (0.83-0.97) <sup>#</sup> | 0.90 (0.84-0.97) <sup>#</sup> | 1.01 (0.93-1.10)               |
| <b>Latency period (months)</b> |                               |                                |                               |                               |                               |                                |
| 2-5                            | 0.96 (0.83-1.10)              | 0.85 (0.43-1.53)               | 0.62 (0.40-0.94) <sup>#</sup> | 1.00 (0.74-1.32)              | 1.09 (0.84-1.41)              | 1.03 (0.79-1.33)               |
| 6-11                           | 0.94 (0.83-1.06)              | 0.65 (0.32-1.16)               | 1.14 (0.86-1.48)              | 0.82 (0.61-1.06)              | 0.73 (0.55-0.96) <sup>#</sup> | 1.17 (0.94-1.43)               |
| 12-59                          | 0.89 (0.84-0.94) <sup>#</sup> | 1.01 (0.80-1.26)               | 0.86 (0.74-0.99) <sup>#</sup> | 0.82 (0.73-0.93) <sup>#</sup> | 0.88 (0.79-0.97) <sup>#</sup> | 0.95 (0.85-1.06)               |
| 60-119                         | 0.95 (0.87-1.03)              | 0.91 (0.61-1.30)               | 0.98 (0.78-1.20)              | 0.90 (0.75-1.08)              | 0.92 (0.81-1.06)              | 1.10 (0.86-1.38)               |
| ≥120                           | 1.09 (0.97-1.22)              | 1.20 (0.83-1.68)               | 1.12 (0.88-1.42)              | 1.11 (0.92-1.34)              | 1.00 (0.80-1.23)              | NA                             |
| <b>Age (years)</b>             |                               |                                |                               |                               |                               |                                |
| 0-9                            | 0.00 (0.00-19068.36)          | 0.00 (0.00-0.00)               | 0.00 (0.00-19068.36)          | 0.00 (0.00-0.00)              | 0.00 (0.00-0.00)              | 0.00 (0.00-0.00)               |
| 10-19                          | 0.00 (0.00-6472.56)           | 0.00 (0.00-0.00)               | 0.00 (0.00-0.00)              | 0.00 (0.00-0.00)              | 0.00 (0.00-22960.34)          | 0.00 (0.00-9013.48)            |
| 20-29                          | 3.15 (0.35-11.38)             | 9.97 (1.12-36.01) <sup>#</sup> | 0.00 (0.00-18.53)             | 0.00 (0.00-36.85)             | 0.00 (0.00-36.94)             | 0.00 (0.00-98.85)              |
| 30-39                          | 1.32 (0.77-2.12)              | 0.85 (0.01-4.72)               | 1.15 (0.31-2.94)              | 1.24 (0.40-2.90)              | 0.93 (0.19-2.70)              | 4.40 (1.18-11.27) <sup>#</sup> |
| 40-49                          | 1.07 (0.88-1.29)              | 1.28 (0.61-2.36)               | 0.97 (0.57-1.55)              | 1.25 (0.89-1.70)              | 0.99 (0.69-1.38)              | 0.81 (0.39-1.49)               |
| 50-59                          | 1.02 (0.93-1.12)              | 1.20 (0.85-1.63)               | 0.91 (0.71-1.16)              | 0.95 (0.78-1.16)              | 1.01 (0.86-1.18)              | 1.19 (0.95-1.46)               |
| 60-69                          | 0.98 (0.92-1.05)              | 1.09 (0.83-1.40)               | 0.98 (0.83-1.14)              | 0.88 (0.75-1.01)              | 0.99 (0.88-1.12)              | 1.04 (0.90-1.20)               |
| 70-79                          | 0.85 (0.79-0.92) <sup>#</sup> | 0.60 (0.41-0.85) <sup>#</sup>  | 0.94 (0.80-1.10)              | 0.86 (0.74-0.99) <sup>#</sup> | 0.81 (0.71-0.93) <sup>#</sup> | 0.90 (0.77-1.05)               |
| 80+                            | 0.83 (0.74-0.94) <sup>#</sup> | 1.07 (0.65-1.65)               | 0.74 (0.53-1.01)              | 0.84 (0.64-1.07)              | 0.70 (0.55-0.88) <sup>#</sup> | 1.01 (0.81-1.25)               |
| <b>Race</b>                    |                               |                                |                               |                               |                               |                                |
| White                          | 0.89 (0.85-0.93) <sup>#</sup> | 0.95 (0.80-1.13)               | 0.89 (0.80-0.99) <sup>#</sup> | 0.87 (0.79-0.96) <sup>#</sup> | 0.85 (0.78-0.92) <sup>#</sup> | 0.94 (0.85-1.04)               |
| Black                          | 1.08 (0.99-1.17)              | 0.99 (0.66-1.43)               | 1.06 (0.86-1.29)              | 1.00 (0.83-1.19)              | 1.13 (0.97-1.31)              | 1.12 (0.93-1.33)               |
| Other                          | 1.09 (0.91-1.30)              | 1.52 (0.56-3.31)               | 0.99 (0.54-1.66)              | 0.93 (0.59-1.38)              | 0.90 (0.64-1.24)              | 1.44 (1.07-1.90) <sup>#</sup>  |
| <b>Sex</b>                     |                               |                                |                               |                               |                               |                                |
| Female                         | 0.96 (0.90-1.02)              | 0.97 (0.75-1.24)               | 0.93 (0.79-1.08)              | 0.94 (0.82-1.07)              | 0.90 (0.80-1.01)              | 1.09 (0.96-1.25)               |
| Male                           | 0.92 (0.87-0.96) <sup>#</sup> | 0.98 (0.79-1.19)               | 0.93 (0.82-1.04)              | 0.87 (0.79-0.97) <sup>#</sup> | 0.91 (0.83-0.99) <sup>#</sup> | 0.96 (0.86-1.07)               |

<sup>#</sup>  $p < 0.05$ .

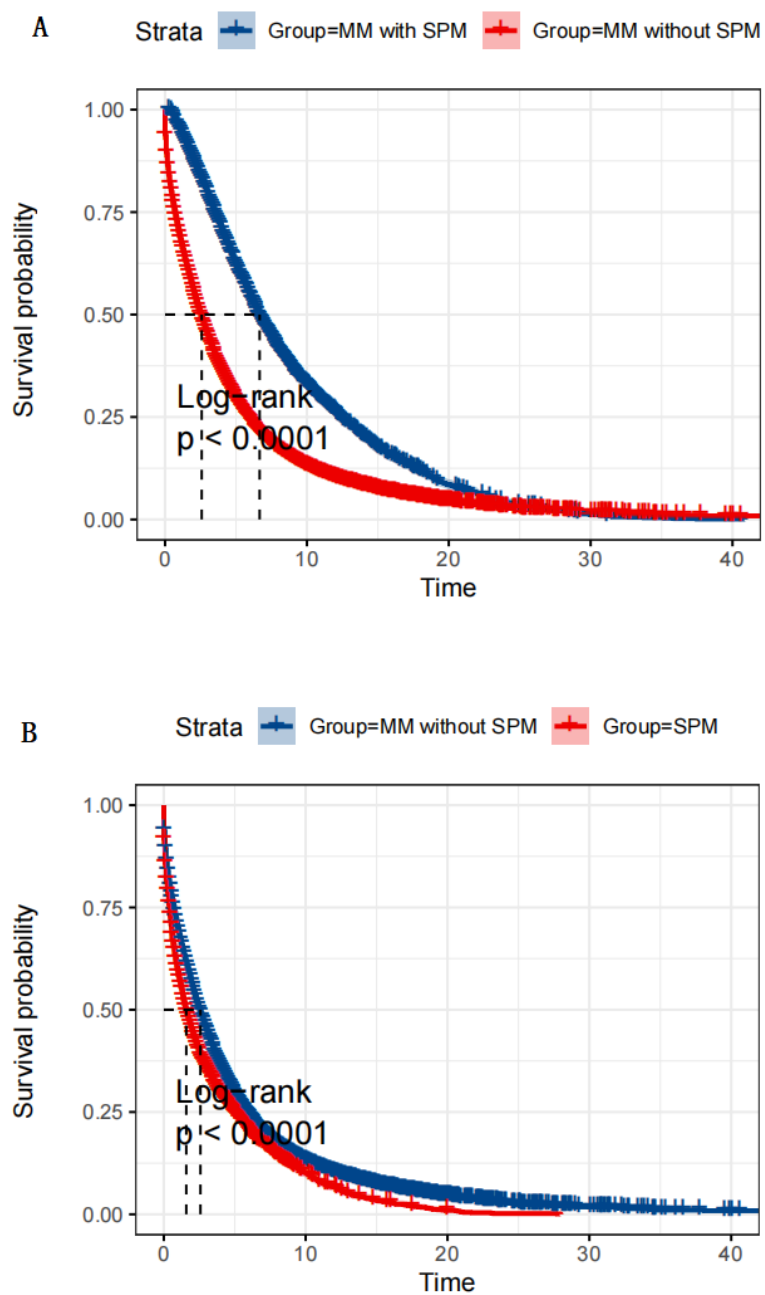

**Figure S1.** KM curve for OS. (A) Survival time from MM diagnosis; (B) Survival time from SPM diagnosis.
